# Supplementary material for: In vivo safety evaluation and tracing of arginylglycylaspartic acid-engineered phage nanofiber in murine model
Source: Royal Society of Chemistry journal article supplement (doi:10.1039/d4tb00823e), 2024-01-01
Supplement: d4tb00823e1.pdf [file d4tb00823e1.pdf]

## Supporting Information

# *In vivo* safety evaluation and tracing of arginylglycylaspartic acid-engineered phage nanofiber in murine model

*Kshitiz Raj Shrestha,<sup>‡</sup> Sehoon Kim,<sup>‡</sup> Anna Jo,<sup>‡</sup> Murali Ragothaman, and So Young Yoo\**

*Institute of Nanobio Convergence, Pusan National University, Busan 46241, Republic of Korea*

\*Correspondence: yoosy2@gmail.com, yoosy@pusan.ac.kr; Tel.: +82-51-510-3402.

**Table S1. Primers used in this study**

| Name                 | Sequence (5' → 3')       | Product Length |
|----------------------|--------------------------|----------------|
| Mouse CD86           | FW GCCCATTTACAAAGGCTCAA  | 156            |
|                      | RE TG TTCCTGTCAAAGCTCGTG |                |
| Mouse TNF $\alpha$   | FW GAACTGGCAGAAGAGGCACT  | 201            |
|                      | RE GGTCTGGGCCATAGAACTGA  |                |
| Mouse IL-10          | FW GCCTTATCGGAAATGATCCA  | 158            |
|                      | RE TTTTCACAGGGGAGAAATCG  |                |
| Mouse $\beta$ -Actin | FW GTCCTCACCTCCCAAAA     | 266            |
|                      | RE GCTGCCTCAACACCTCAACC  |                |

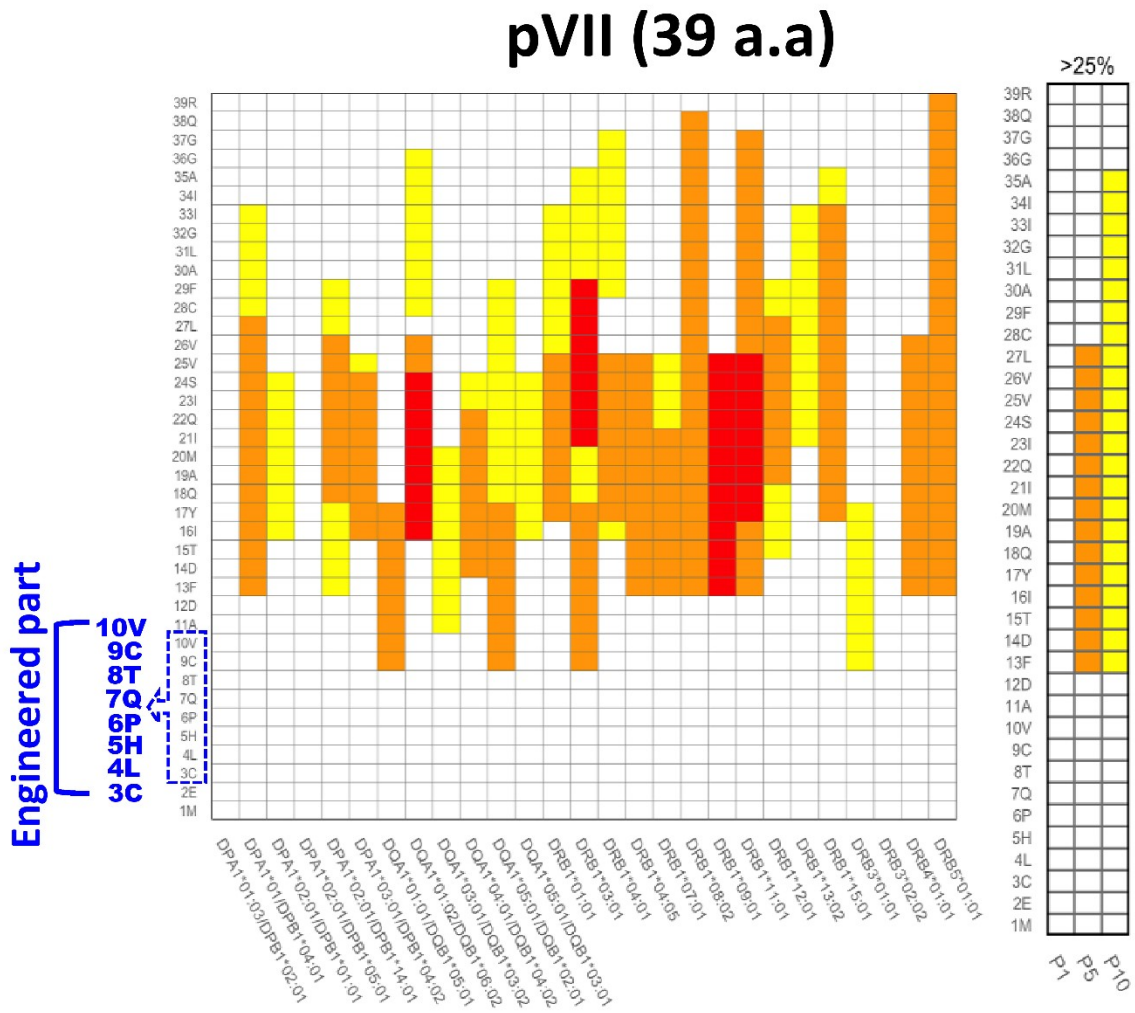

**Figure S1.** Enlarged image of in silico immunogenicity studies on the pVII coat protein of the engineered YSY184 phage.

# pVIII (79 a.a)

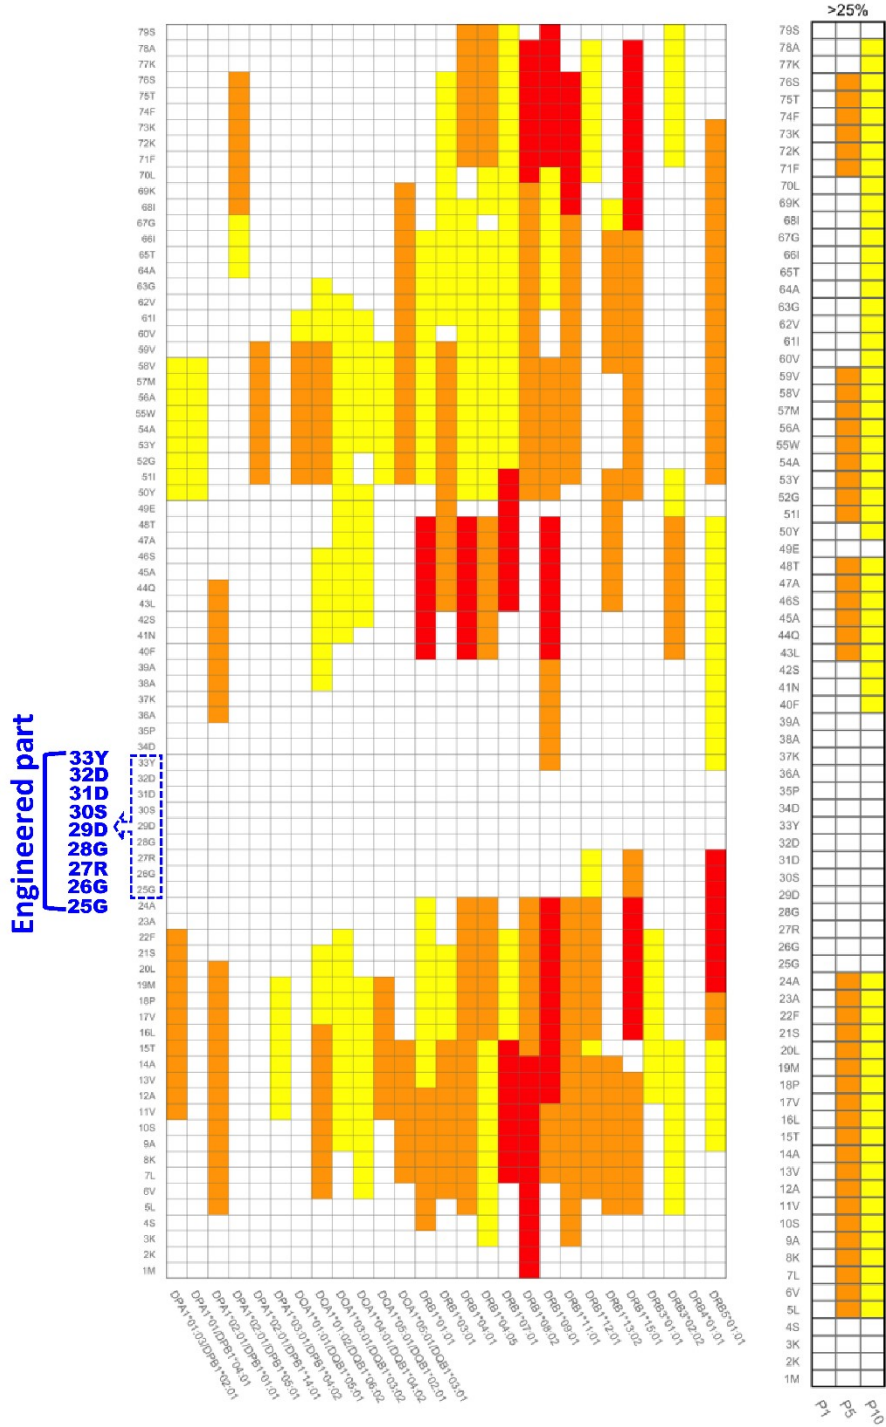

**Figure S2.** Enlarged image of *in silico* immunogenicity studies on the pVIII coat protein of the engineered YSY184 phage.



**a**

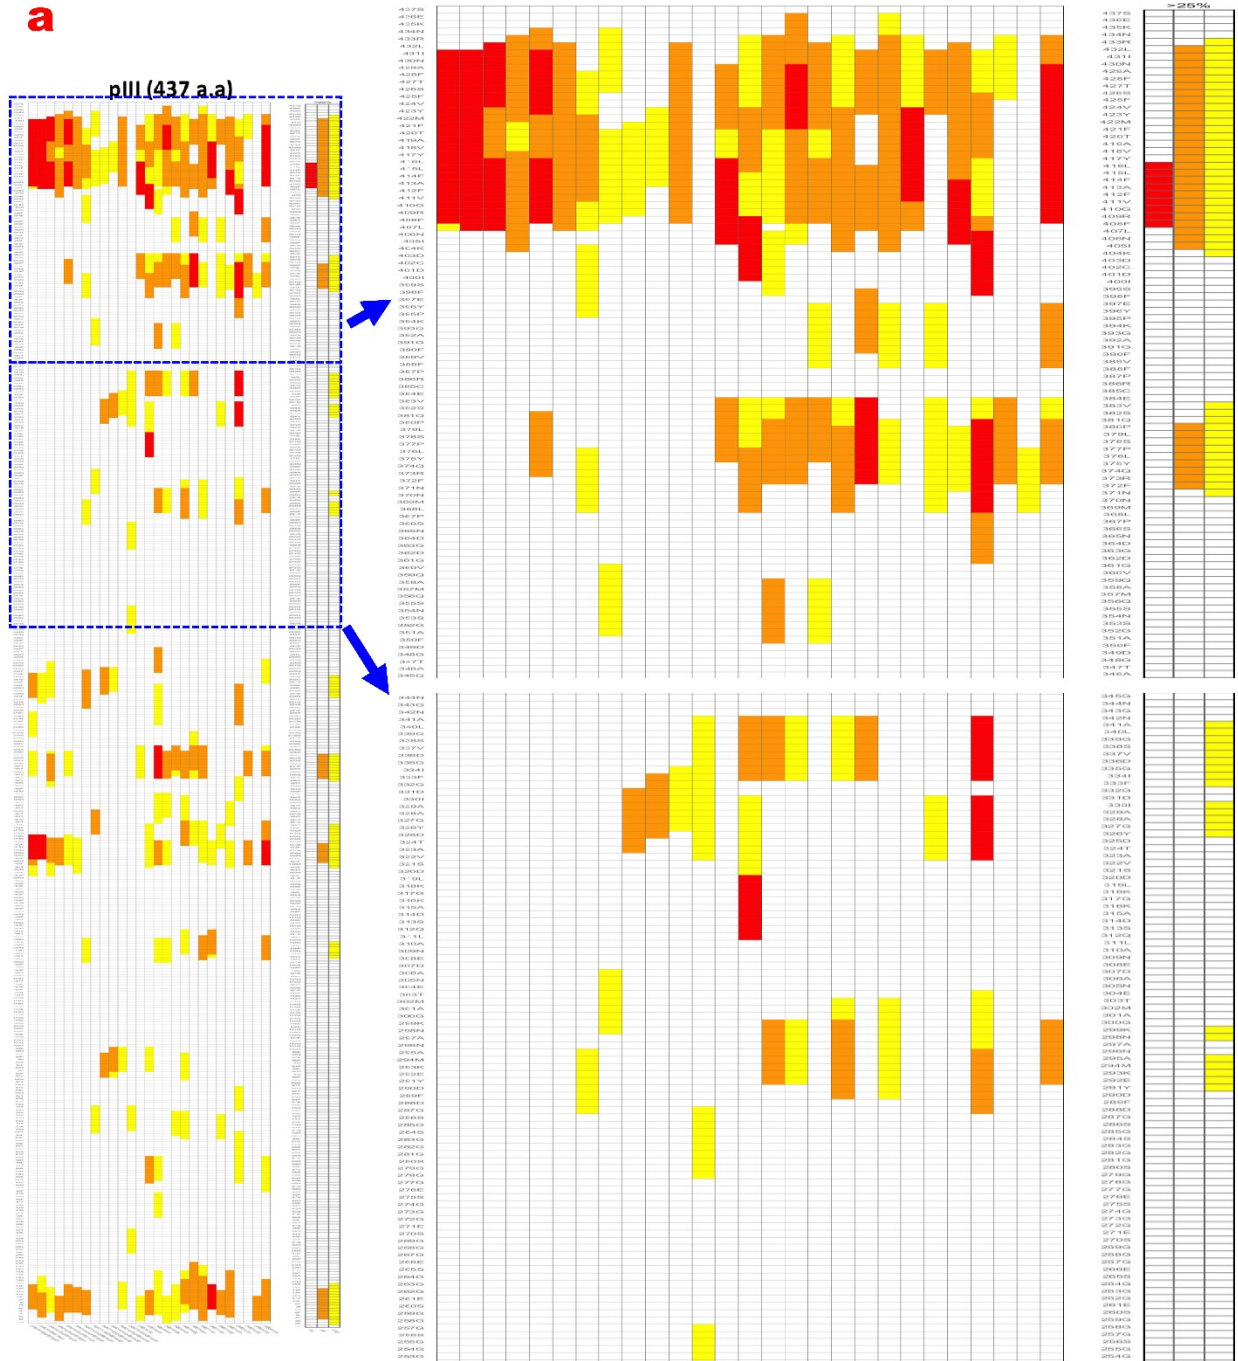



**b**

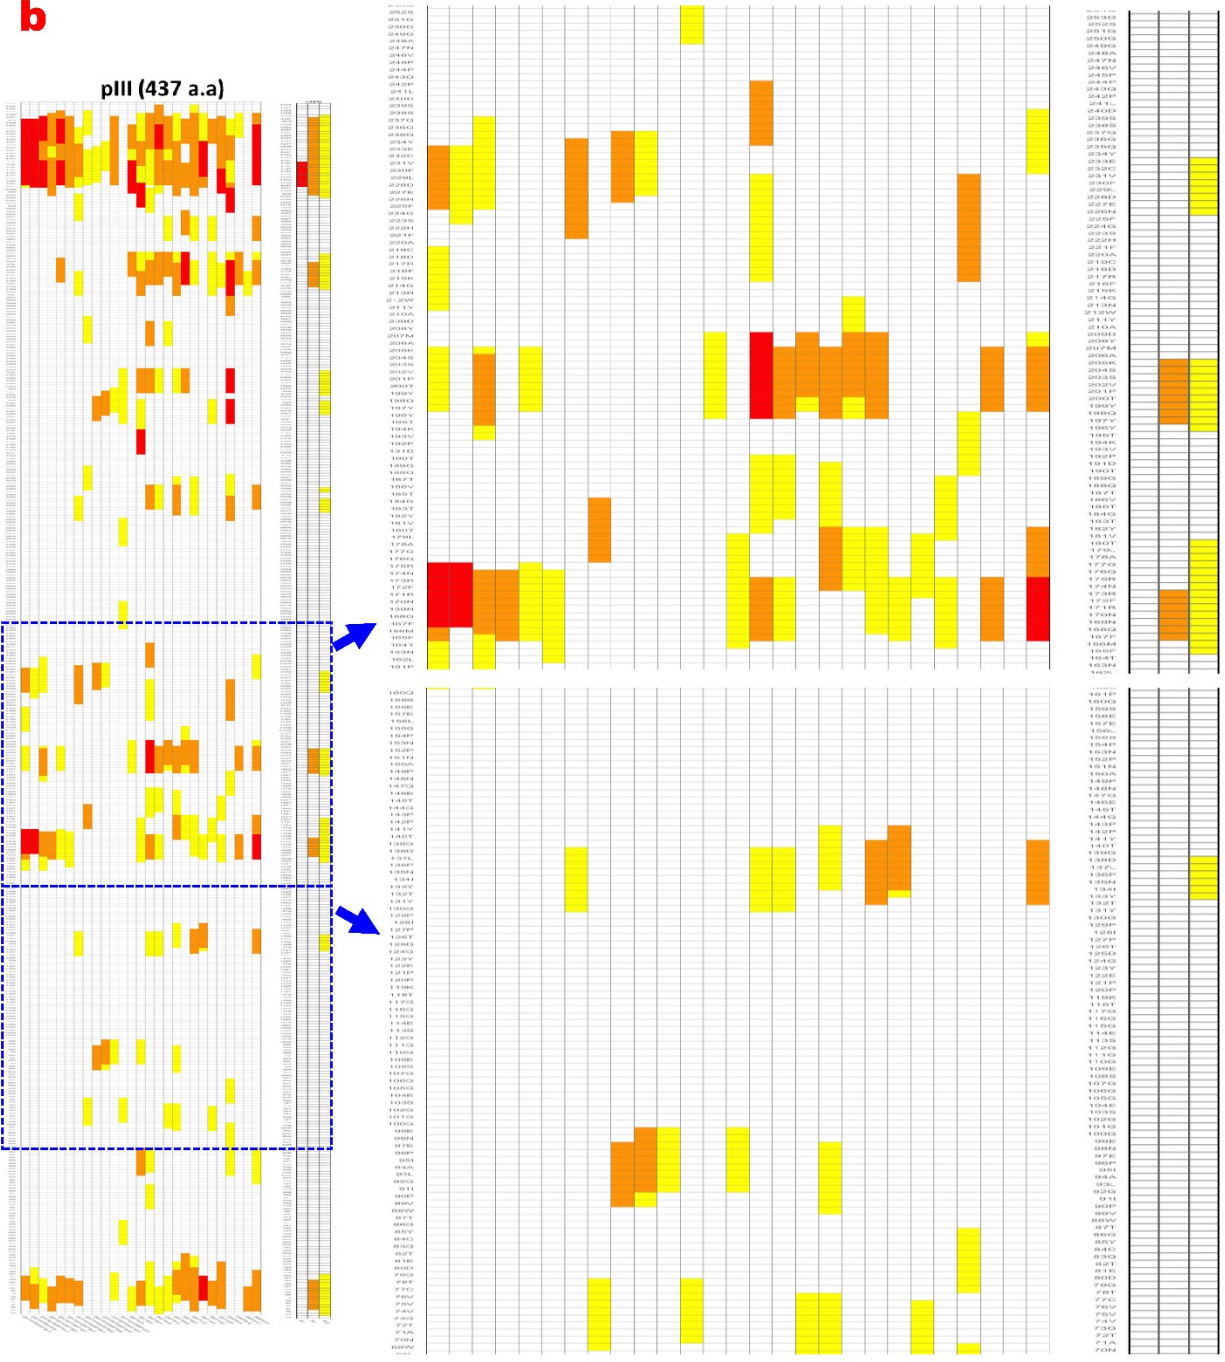

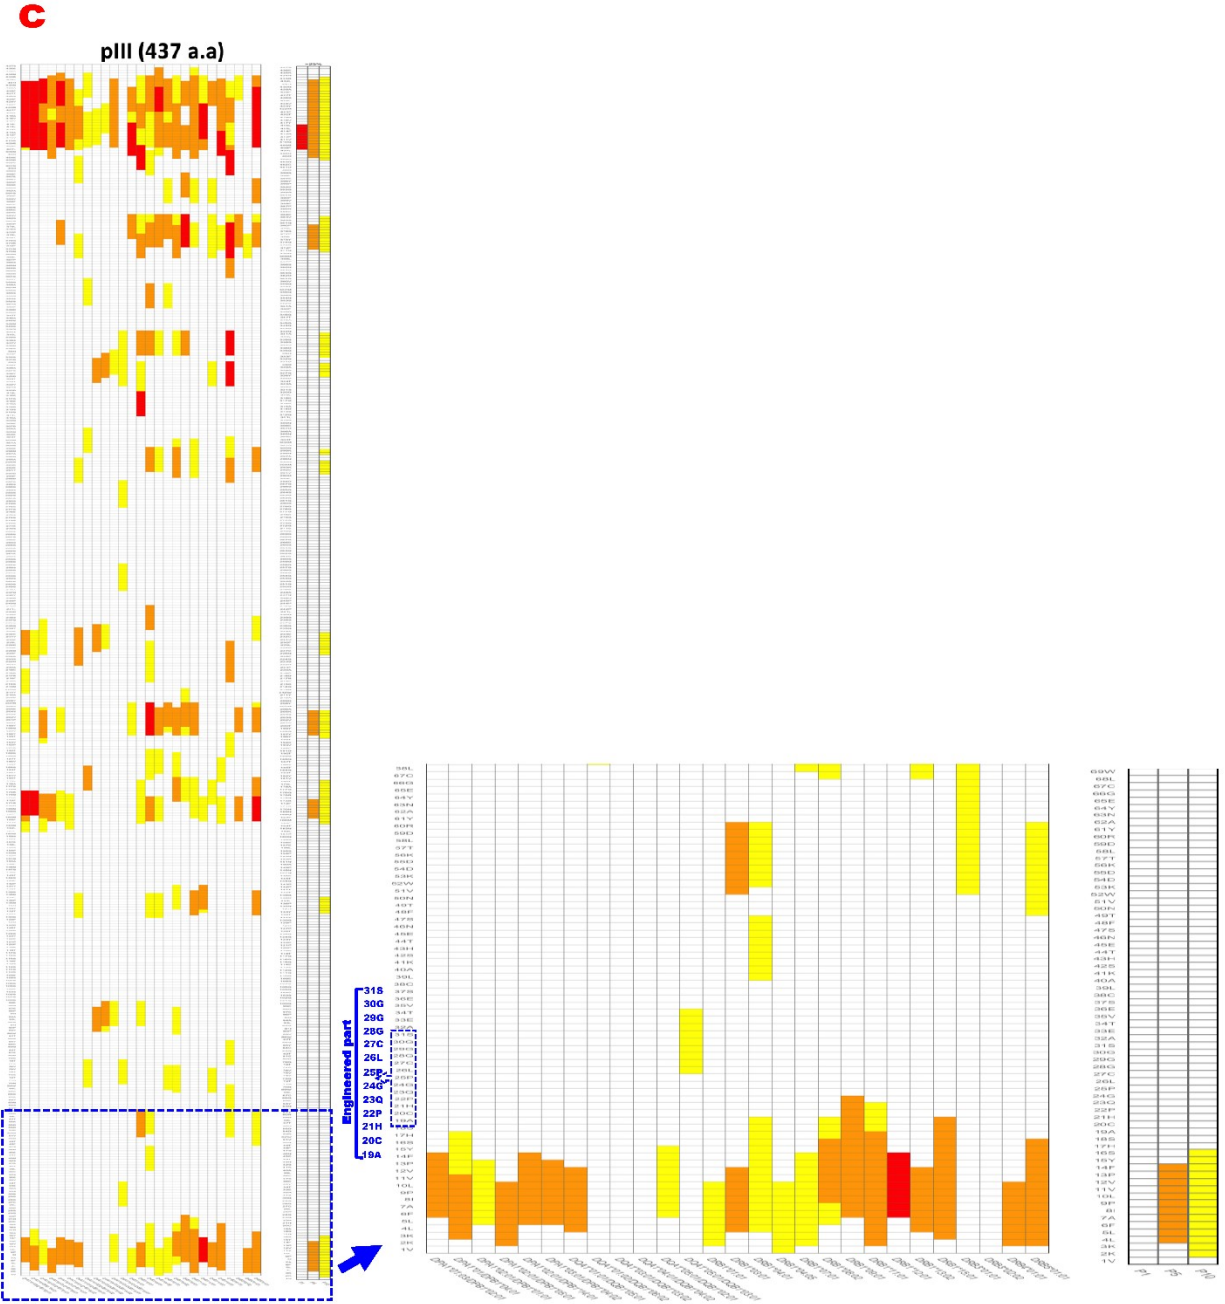

**Figure S3.** Enlarged image of in silico immunogenicity studies on the pIII coat protein of the engineered YSY184 phage (a) from 437S to 253G, (b) 252S to 69 W, and (c) 68 L to 1V.



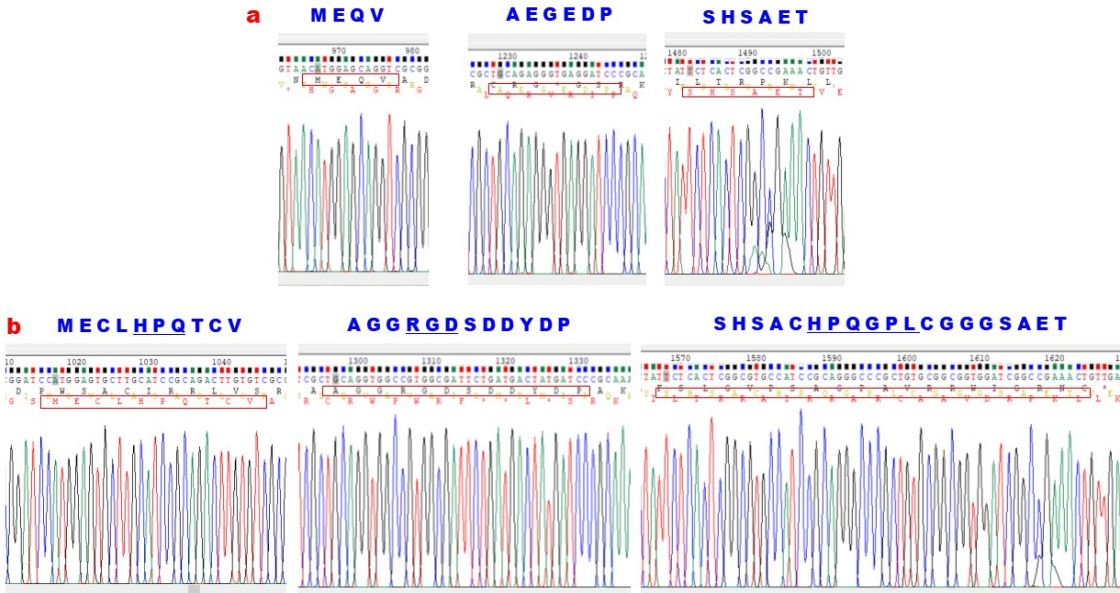

**Figure S4.** Gene sequencing results showing that the functional pVII, pVIII, and pIII coat protein sequences for both the WT (a) and engineered YSY184 (b) phages perfectly matched the native gene sequences.

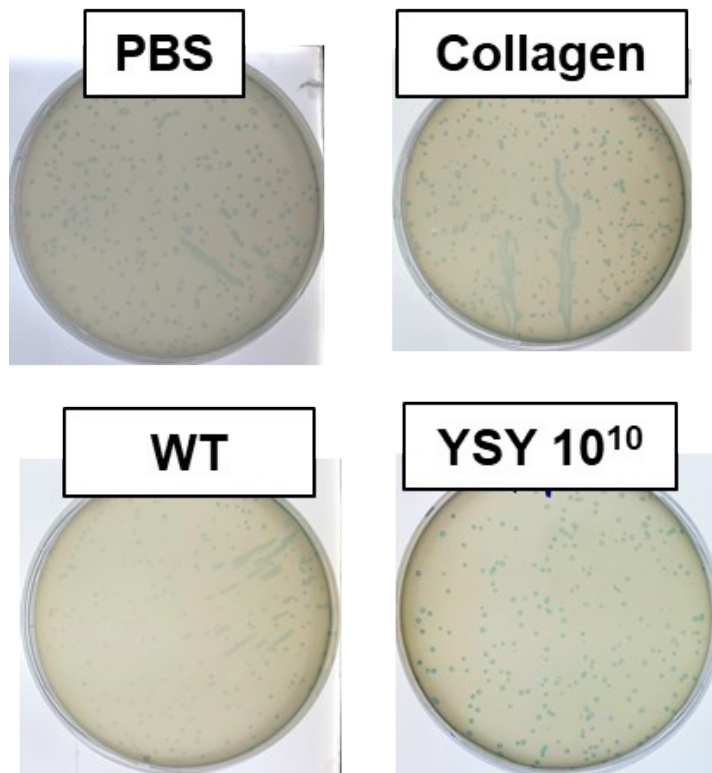

**Figure S5.** Representative plaque titration images corresponding to Figure 4.

CD4<sup>+</sup>

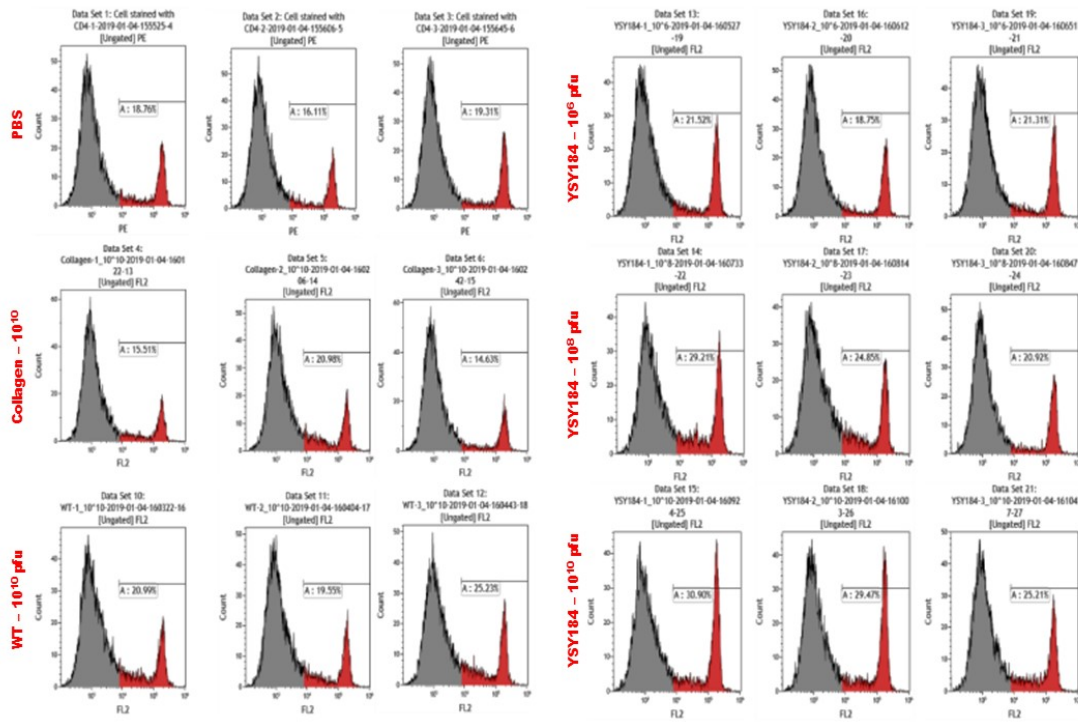

**Figure S6.** Flow cytometry results of the CD4<sup>+</sup> T cell population in the spleen for the phosphate-buffered saline (PBS)-, collagen (10<sup>10</sup> molecules)-, wild-type (WT) (10<sup>10</sup> pfu)-, YSY184 (10<sup>6</sup> pfu)-, YSY184 (10<sup>8</sup> pfu)-, and YSY184 (10<sup>10</sup> pfu)-treated groups.

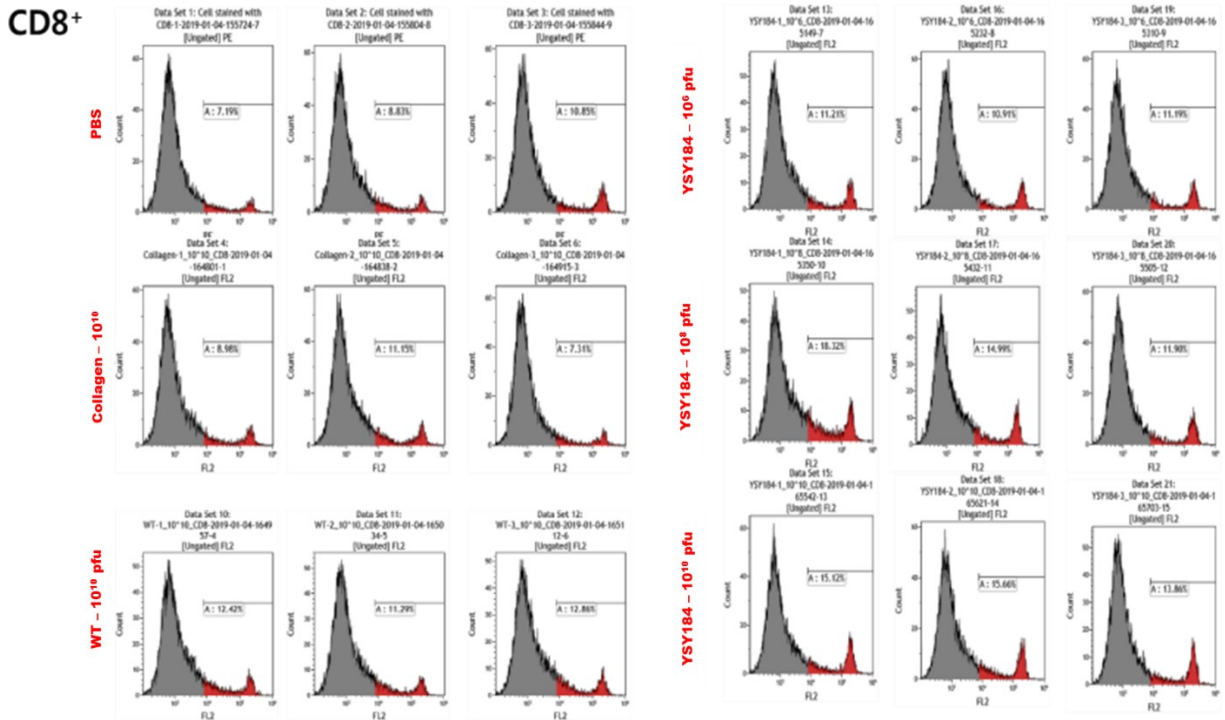

**Figure S7.** Flow cytometry results of the CD8<sup>+</sup> T cell population in the spleen for the phosphate-buffered saline (PBS)-, collagen (10<sup>10</sup> molecules)-, wild-type (WT) (10<sup>10</sup> pfu)-, YSY184 (10<sup>6</sup> pfu)-, YSY184 (10<sup>8</sup> pfu)-, and YSY184 (10<sup>10</sup> pfu)-treated groups.

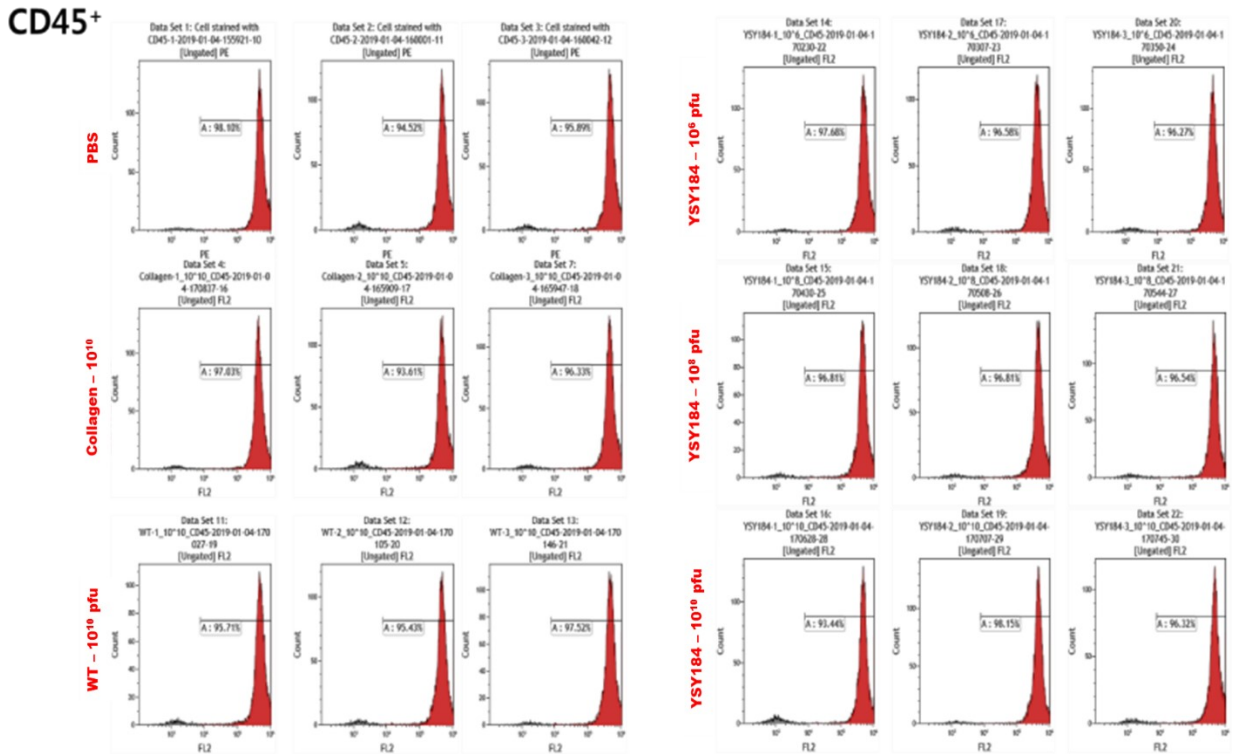

**Figure S8.** Flow cytometry results of the CD45<sup>+</sup> T cell population in the spleen for the phosphate-buffered saline (PBS)-, collagen (10<sup>10</sup> molecules)-, wild-type (WT) (10<sup>10</sup> pfu)-, YSY184 (10<sup>6</sup> pfu)-, YSY184 (10<sup>8</sup> pfu)-, and YSY184 (10<sup>10</sup> pfu)-treated groups.

**a**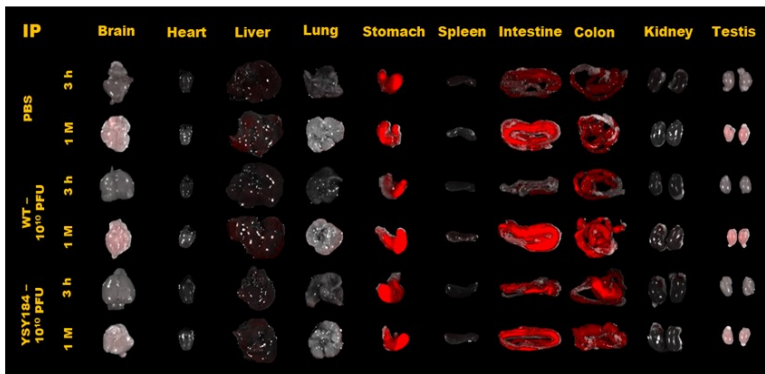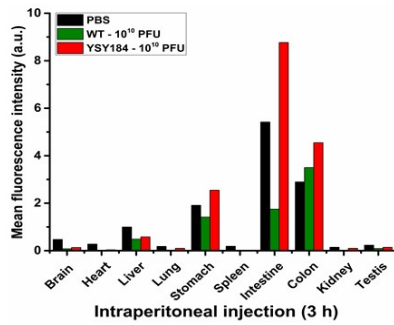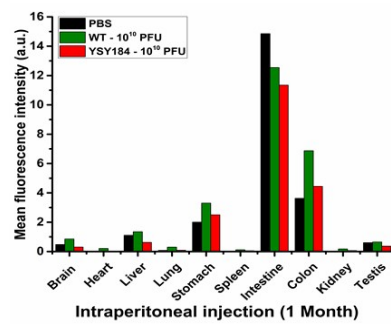**b**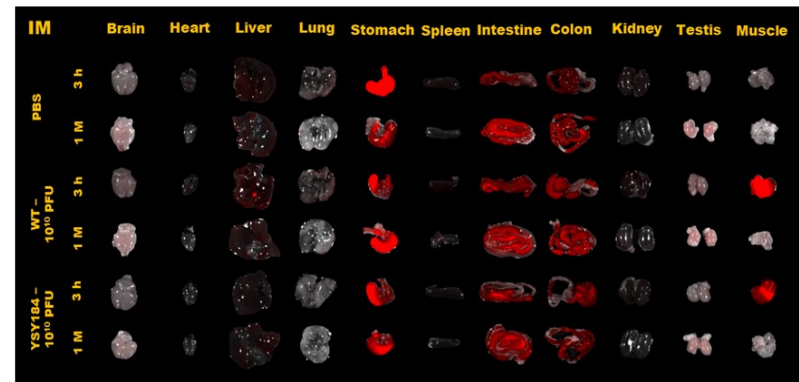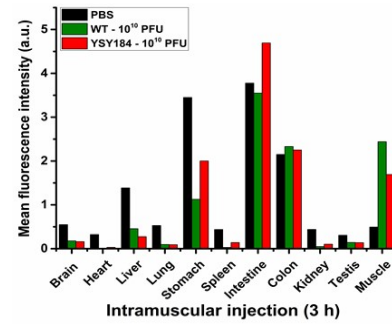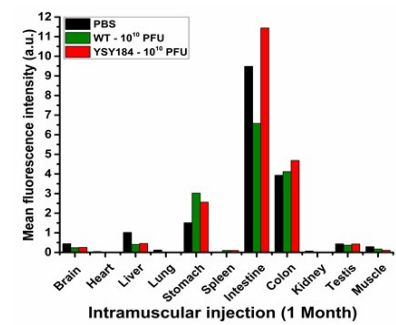

**Figure S9.** Biodistribution of the phages after intraperitoneal and intramuscular administration. (a) Organs procured 3 h and 1 month after intraperitoneal phage administration; (b) Organs harvested 3 h and 1 month after intramuscular phage administration. All fluorescence images were visualized using the FOBI green channel of a fluorescent *in vivo* imaging system.



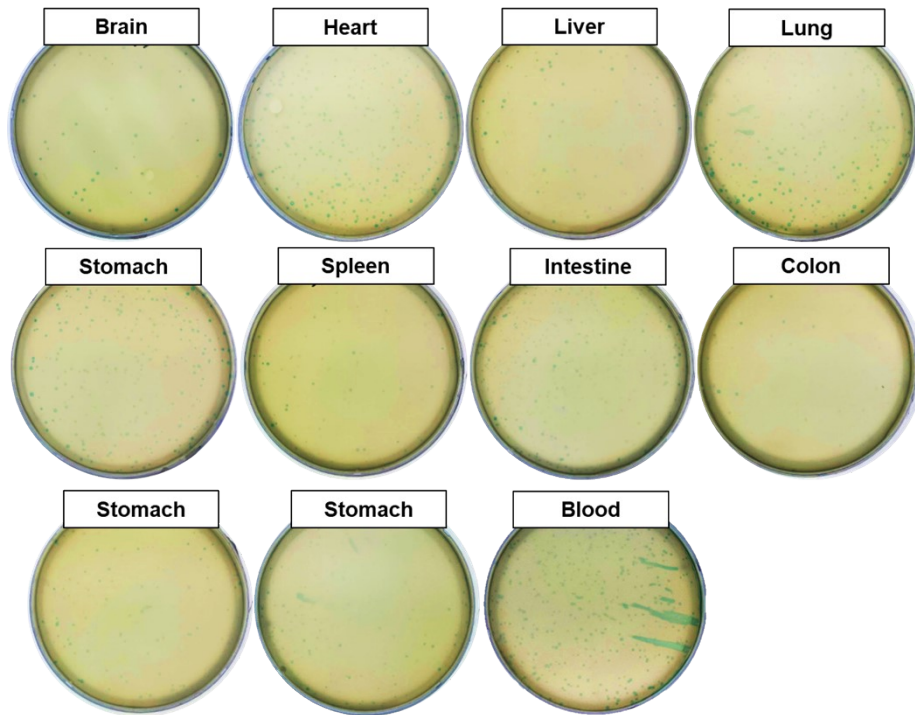

**Figure S10.** Representative plaque titration images corresponding to Figure 9.

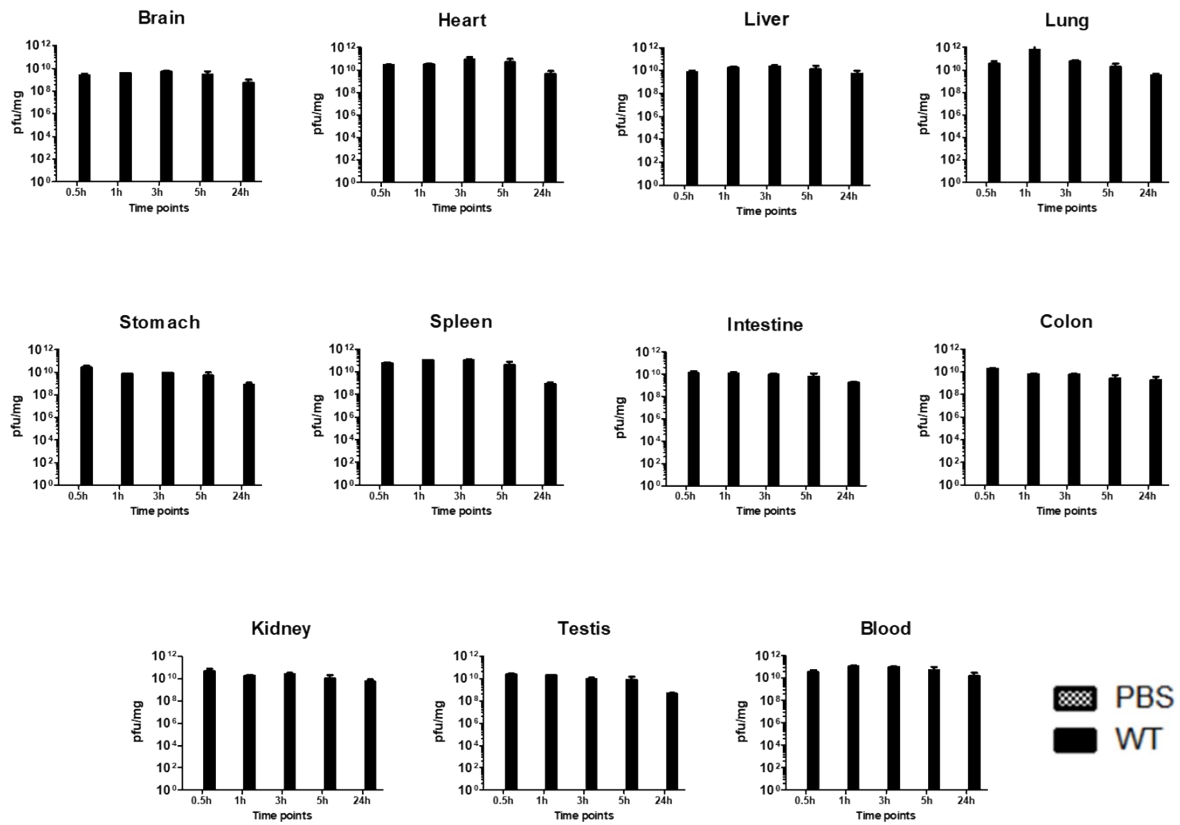

**Figure S11.** The biodistribution patterns of phages after intraperitoneal administration were analyzed using plaque titration in organs procured at different time intervals for the phosphate-buffered saline (PBS)- and wild-type (WT)-treated groups. Mice ( $n = 3$  per group) were administered the selected phage once via intraperitoneal injection. Blood and tissue samples were collected from the mice in each group at 0.5, 1, 3, 5, and 24 h after phage injection. Phage titers were determined using a fresh layer of an appropriate bacterial host strain on top agar. The results are presented as means  $\pm$  SEM

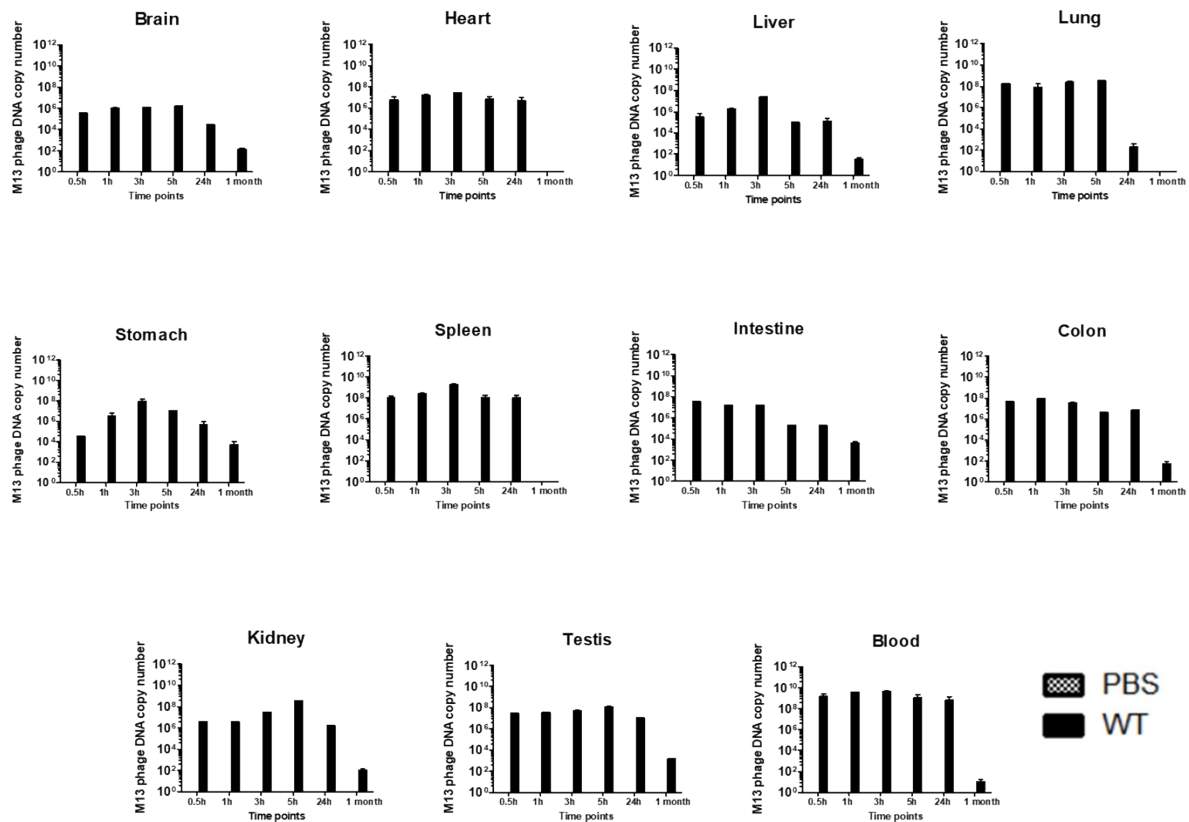

**Figure S12.** Quantification of phage DNA copy numbers distributed in the procured organs of mice after intraperitoneal administration of phosphate-buffered saline (PBS)- and wild-type (WT)-treated groups at different time intervals. Mice ( $n = 3$  per group) were administered the selected phages via intraperitoneal injection. Blood and tissue samples were collected from the mice in each group at 0.5, 1, 3, 5, and 24 h after phage injection. Viral DNA was extracted from each sample and quantitative PCR was performed. The results are presented as means  $\pm$  SEM

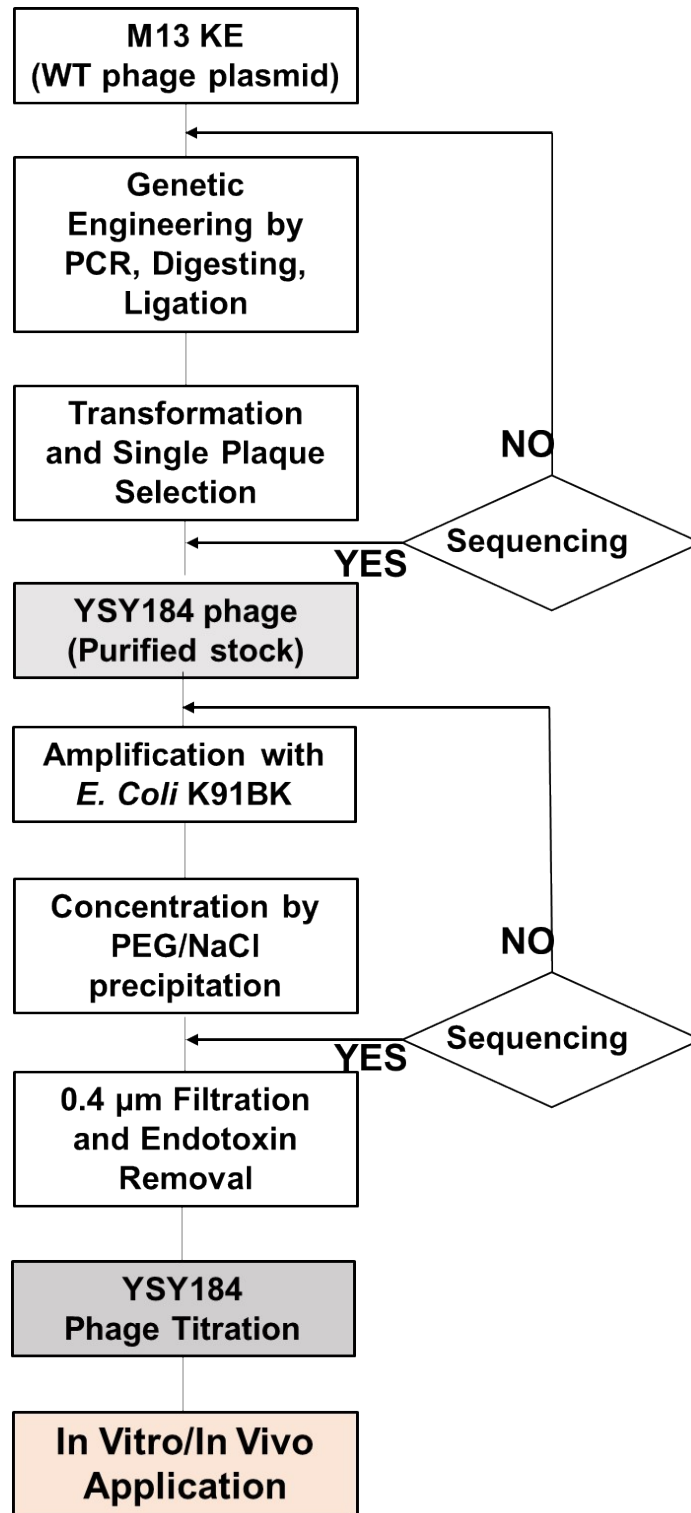

**Figure S13.** A flow chart showing YSY184 engineering, amplification, and purification.

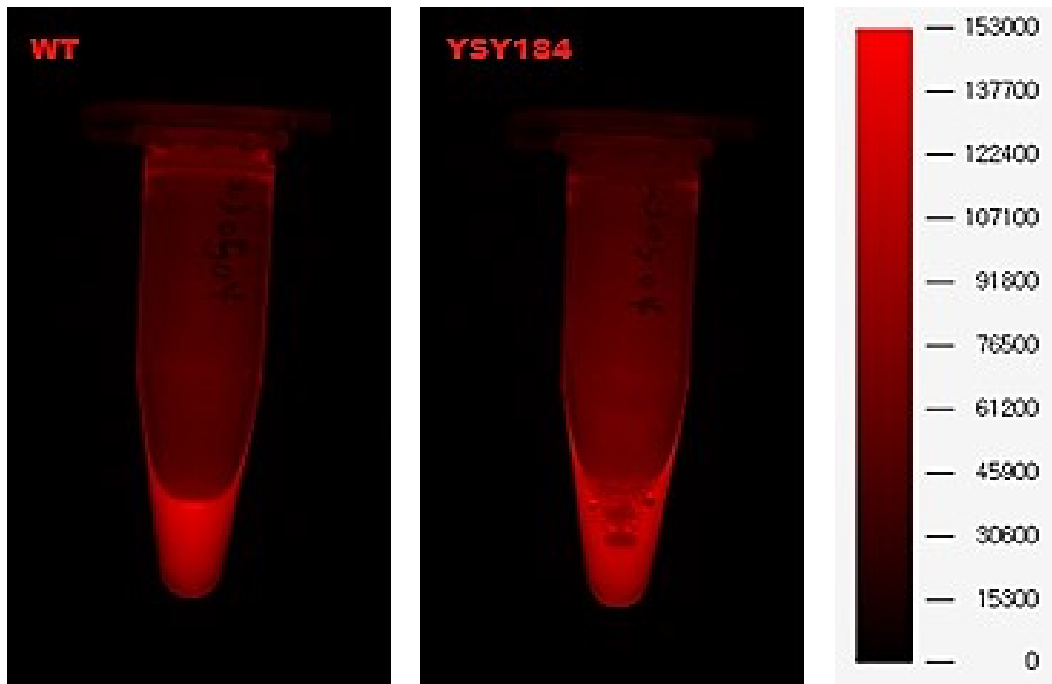

**Figure S14.** Fluorescence images of Texas Red-labeled wild-type (WT) and YSY184 phages, which were recorded using a fluorescence *in vivo* imaging system (FOBI, Neo Science, Suwon, South Korea).
